# Supplementary material for: One-step synthesis of AgBr microcrystals with different morphologies by ILs-assisted hydrothermal method
Source: Royal Society of Chemistry journal article supplement (doi:10.1039/c0ce00856g), 2011-01-01
Supplement: c0ce00856g.pdf [file c0ce00856g.pdf]

## Supporting information

### One-step synthesis of AgBr microcrystals with different morphologies by ILS-assisted hydrothermal method

Zaizhu Lou,<sup>a</sup> Baibiao Huang,<sup>a\*</sup> Xiaoyan Qin,<sup>a</sup> Xiaoyang Zhang,<sup>a</sup> Zeyan Wang,<sup>a</sup> Zhaoke Zheng,<sup>a</sup> Hefeng Cheng,<sup>a</sup> Peng Wang<sup>a</sup> and Ying Dai<sup>b</sup>

<sup>a</sup> State Key Lab of Crystal Materials, Shandong University, Jinan 250100, China. Fax: (+86) 531-8836-5969, E-mail: bbhuang@sdu.edu.cn

<sup>b</sup> School of Physics, Shandong University, Jinan 250100, China

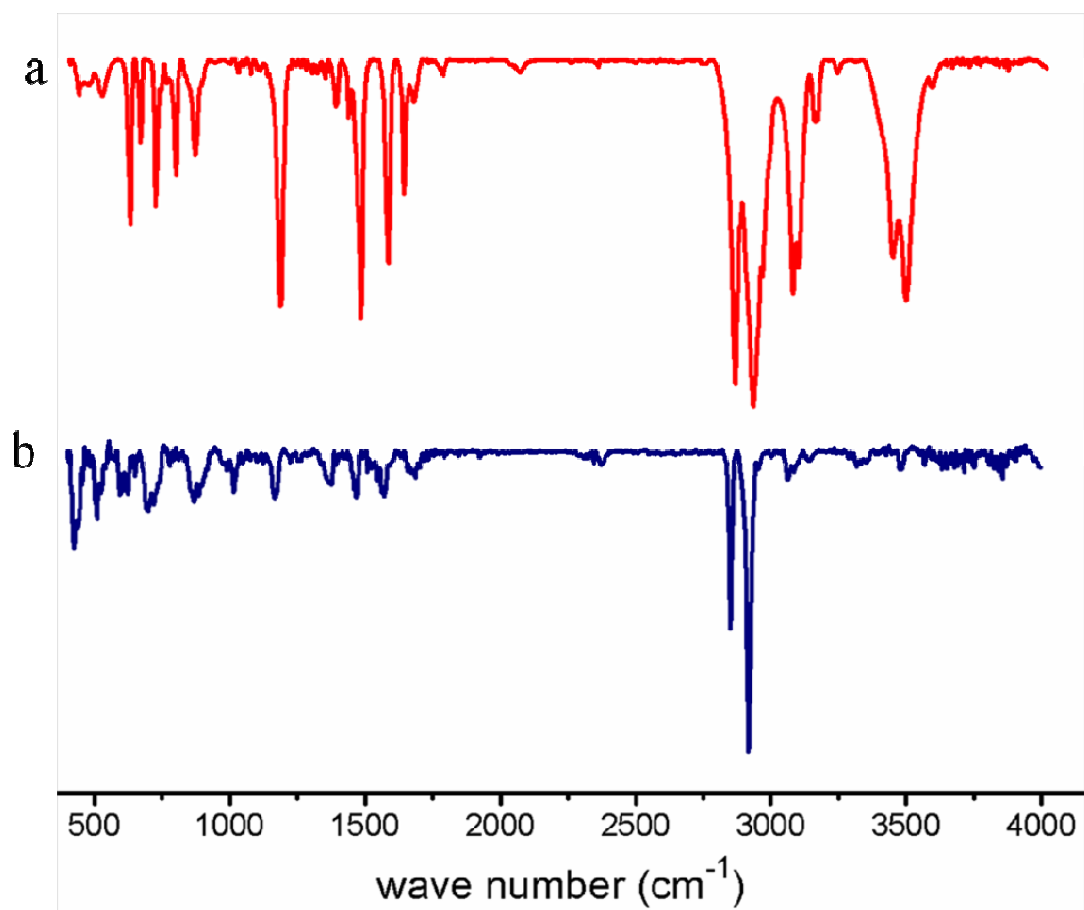

Figure S1. FTIR spectrums of C<sub>16</sub>MimBr (a) and the near-spherical AgBr(b) separated from solution.

The samples separated from solution were used to measure FTIR. FTIR spectras were carried out using Vector-22 spectroscopy. Samples were prepared by dispersing

C<sub>16</sub>MimBr, near-spherical AgBr and cubic AgBr in KBr respectively, and compressing the mixture to form disks.

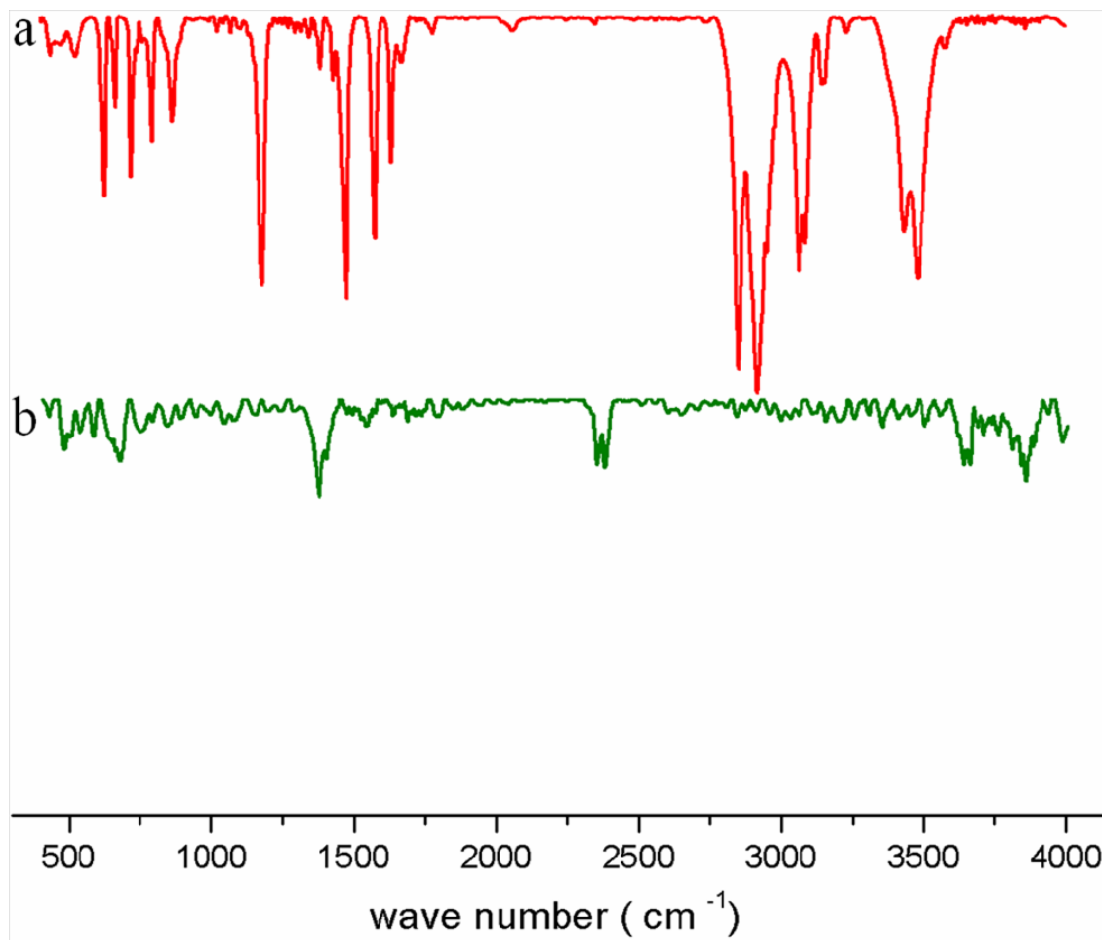

Figure S2. The FTIR spectrums of C<sub>16</sub>MimBr (a) and cubic AgBr (b) prepared in glycol ether.

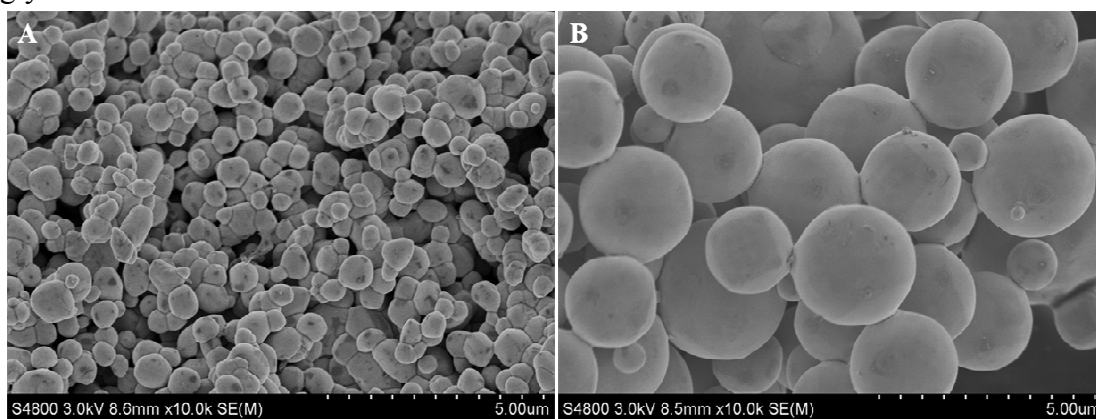

Figure S3: SEM images of samples prepared using C<sub>16</sub>MimBr: A) reaction at room temperature for 10 h, B) reaction during hydrothermal process at 160 °C for 8 h.

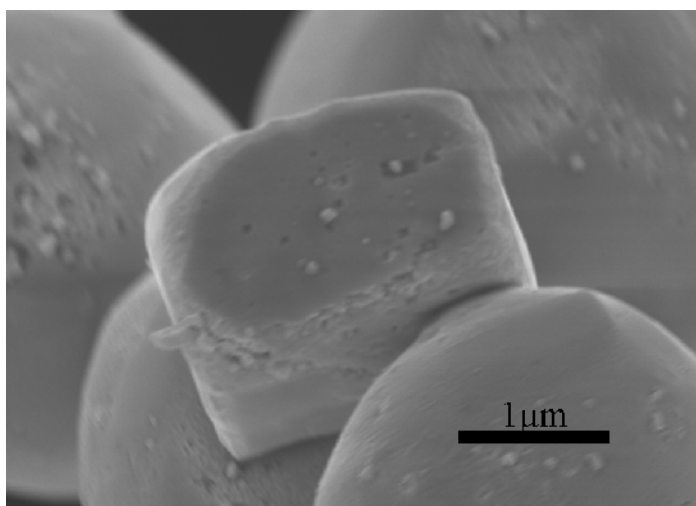

Figure S4: SEM images of the cubic AgBr prepared by KBr.

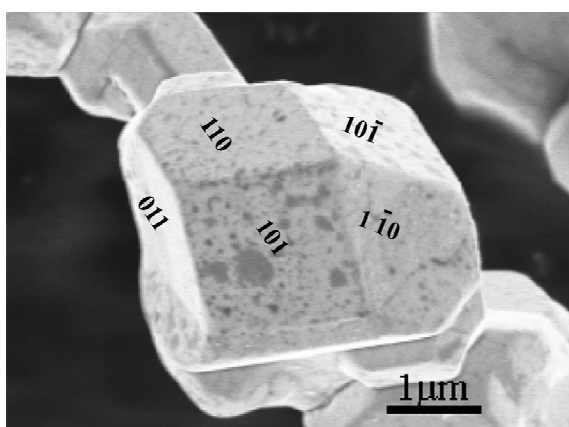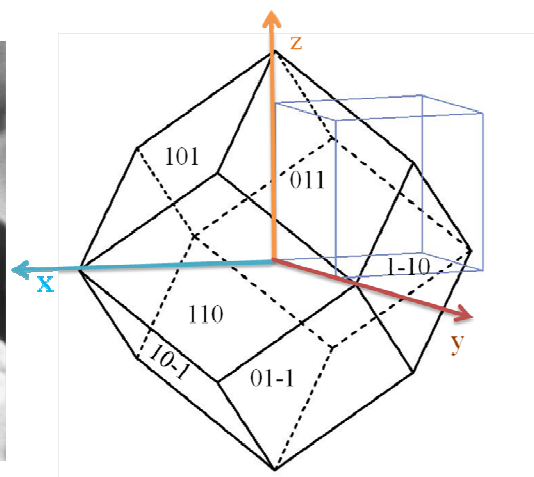

Figure S5. The crystallographic orientations of the exposed facets of AgBr prepared by C<sub>4</sub>MimBr
